# Supplementary material
Source: Springer Nature journal article supplement (https://www.springermedizin.de/resource/supplementary/12968_2013_3349_MOESM1_ESM.pdf/9583670)
Supplement: MOESM1 [file 9583670]

Cine images (25 phases / cardiac cycle)

End-diastole      End-systole      30%-diastole      End-diastole

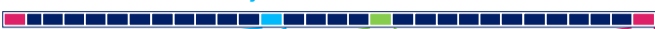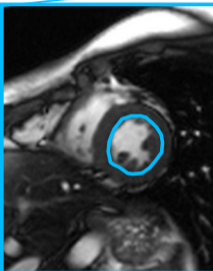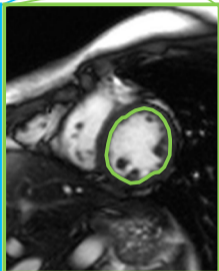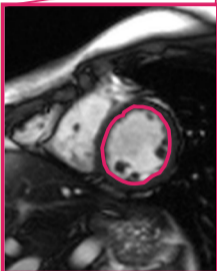

Tracking of LV endomyocardial contours

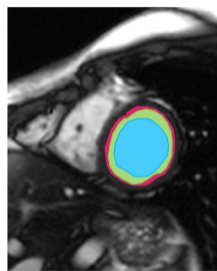

Systolic index (%)

$$\left[ \frac{\text{Red} - \text{Light Blue}}{\text{Red}} \right] \times 100$$

Diastolic index (%)

$$\left[ \frac{\text{Green} - \text{Light Blue}}{\text{Red} - \text{Light Blue}} \right] \times 100$$
